# Supplementary material
Source: MDPI journal article supplement (https://www.mdpi.com/2073-4441/9/11/848)
Supplement: s1 [file s1]

## Application of the approach to selected SNOTEL sites

Observed and simulated SWE at the above SNOTEL stations are compared in more details in the following figures.

### Wolf Creek Summit

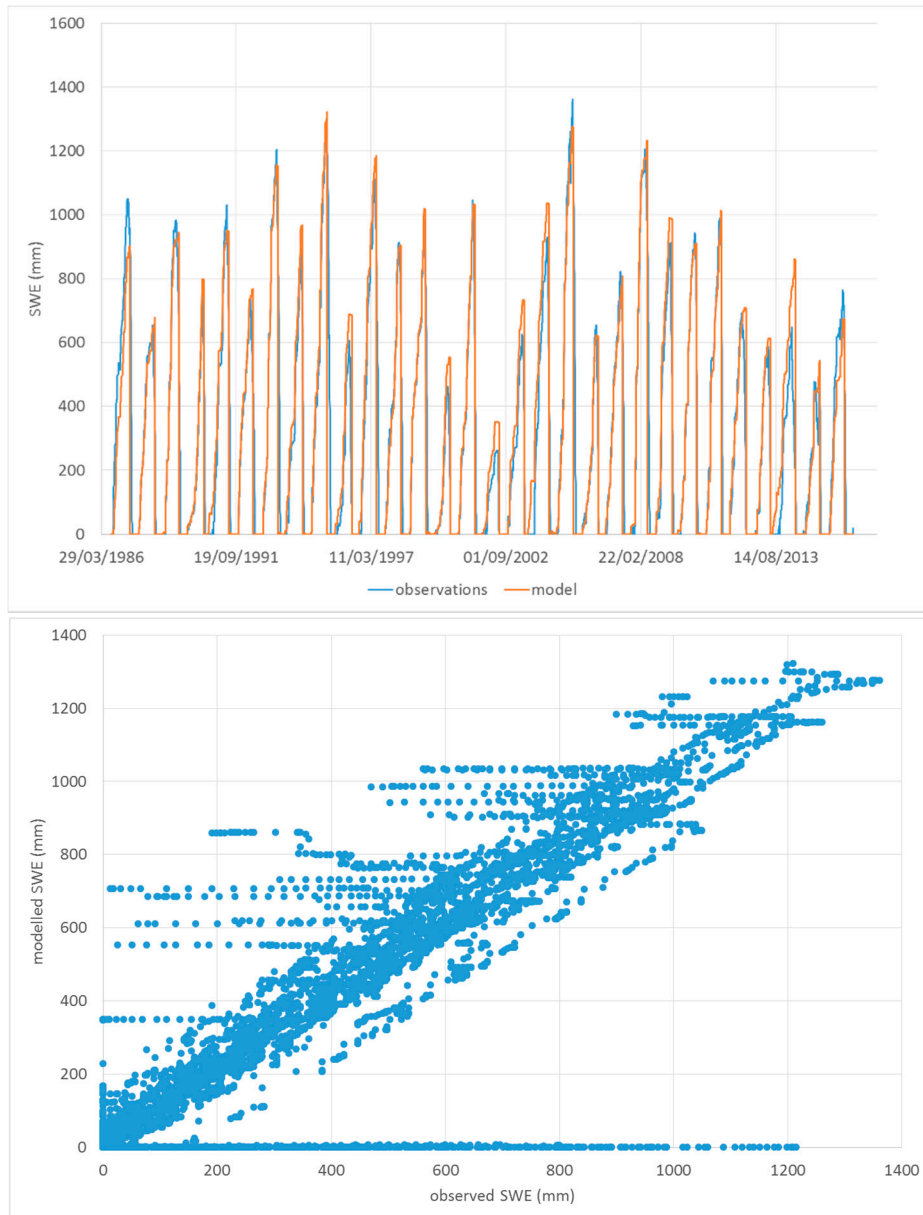

Trinchera

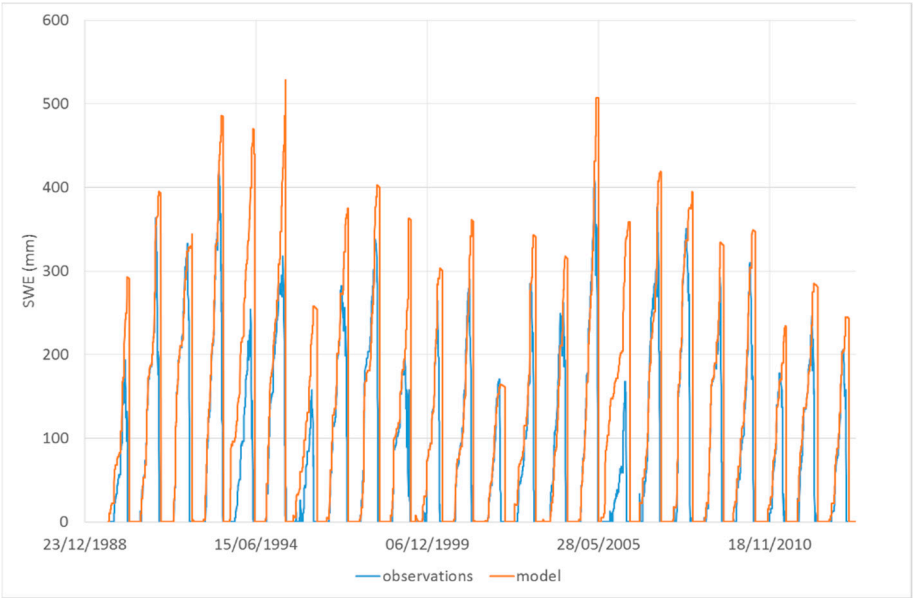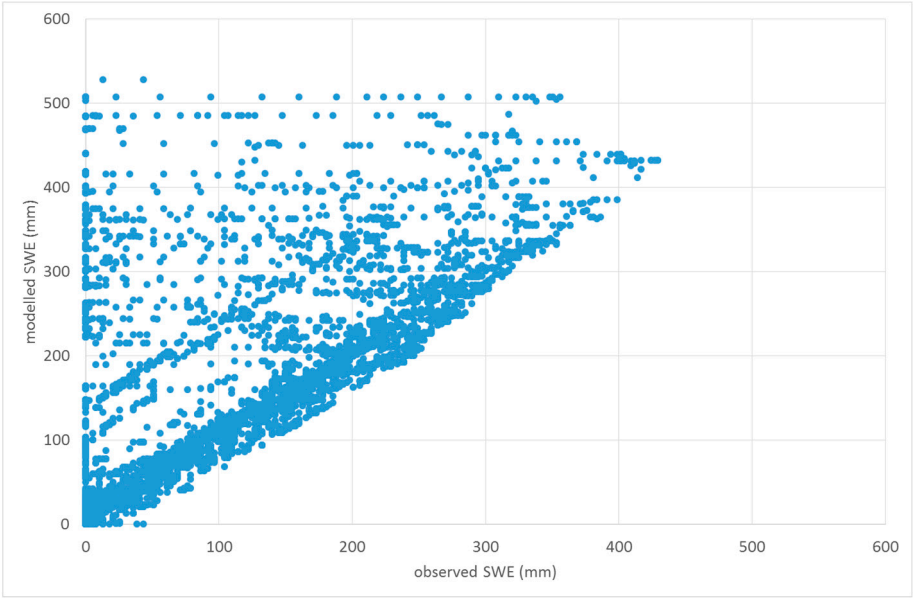

Culebra #2

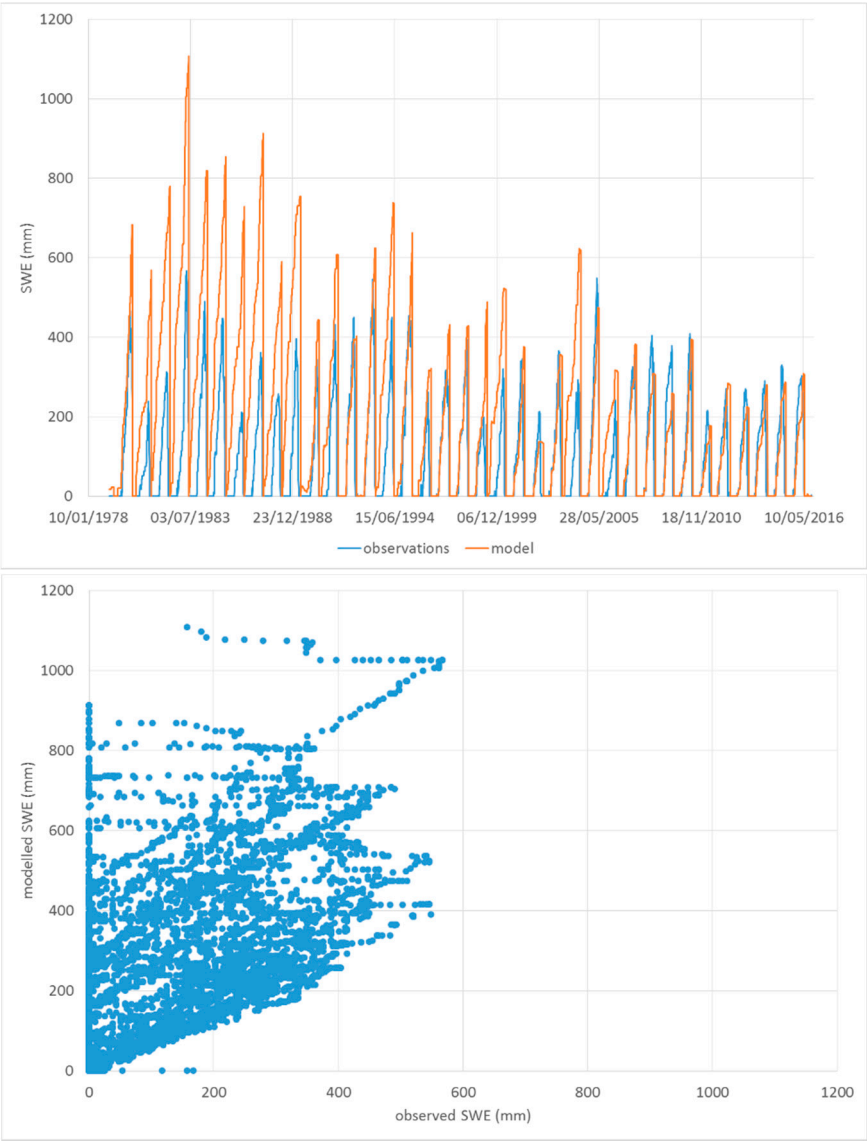

## Lily Pond

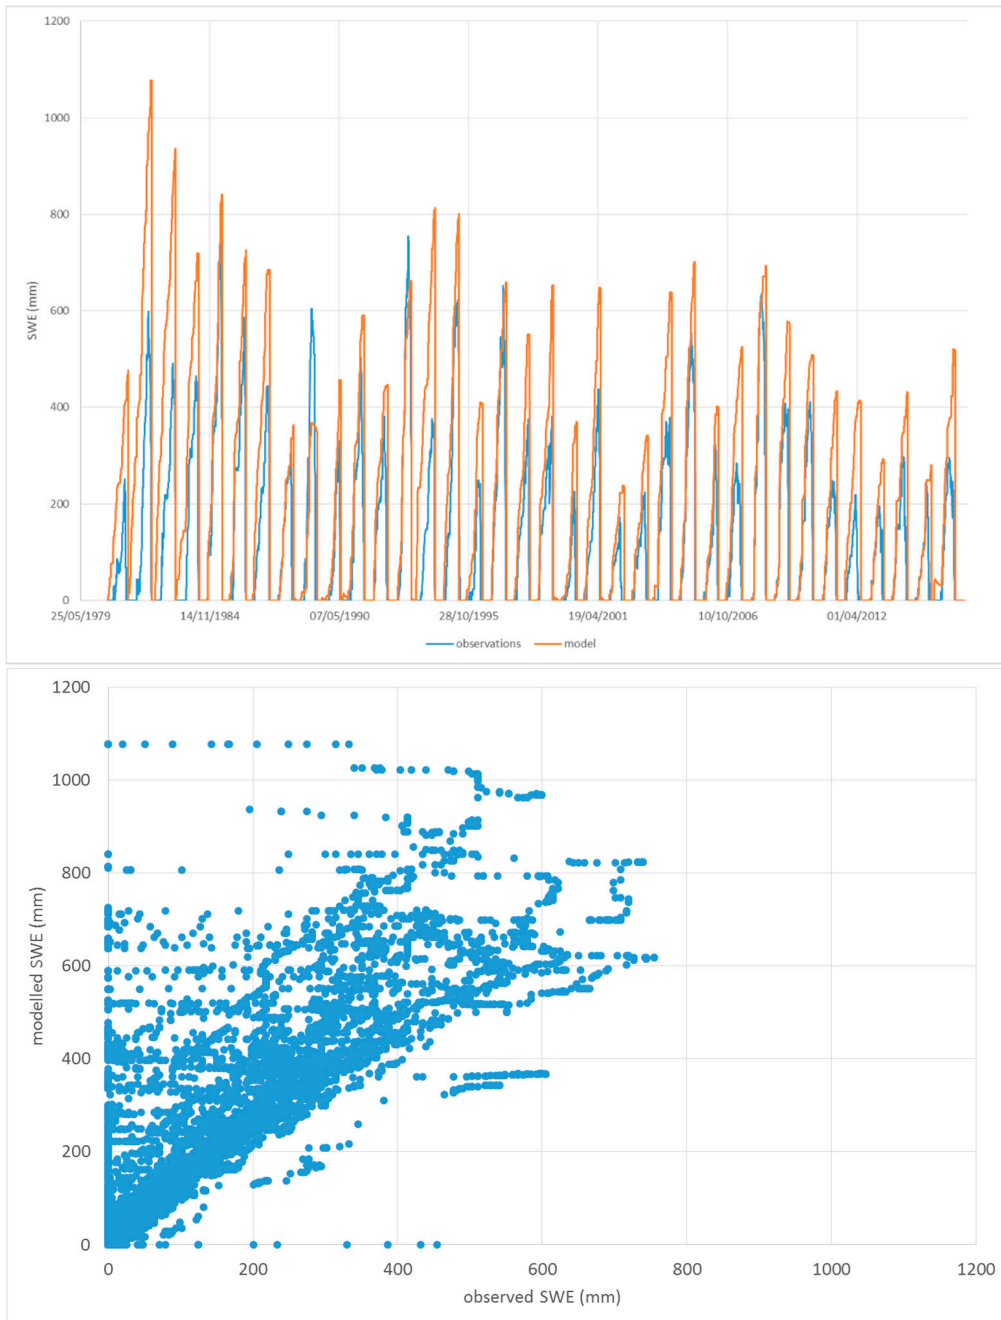

## Middle Creek

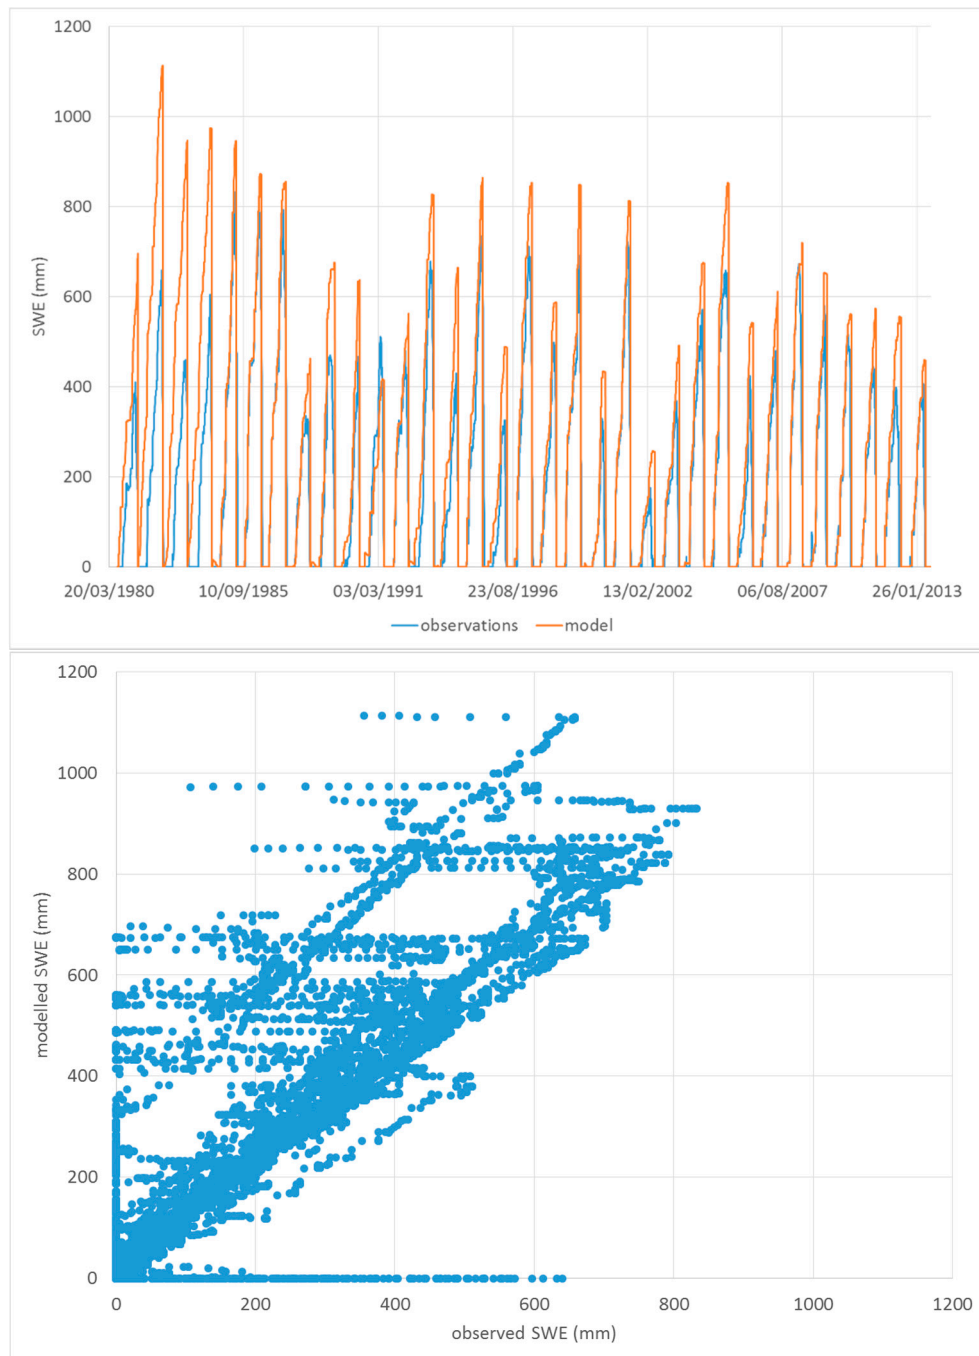

Cumbres Trestle

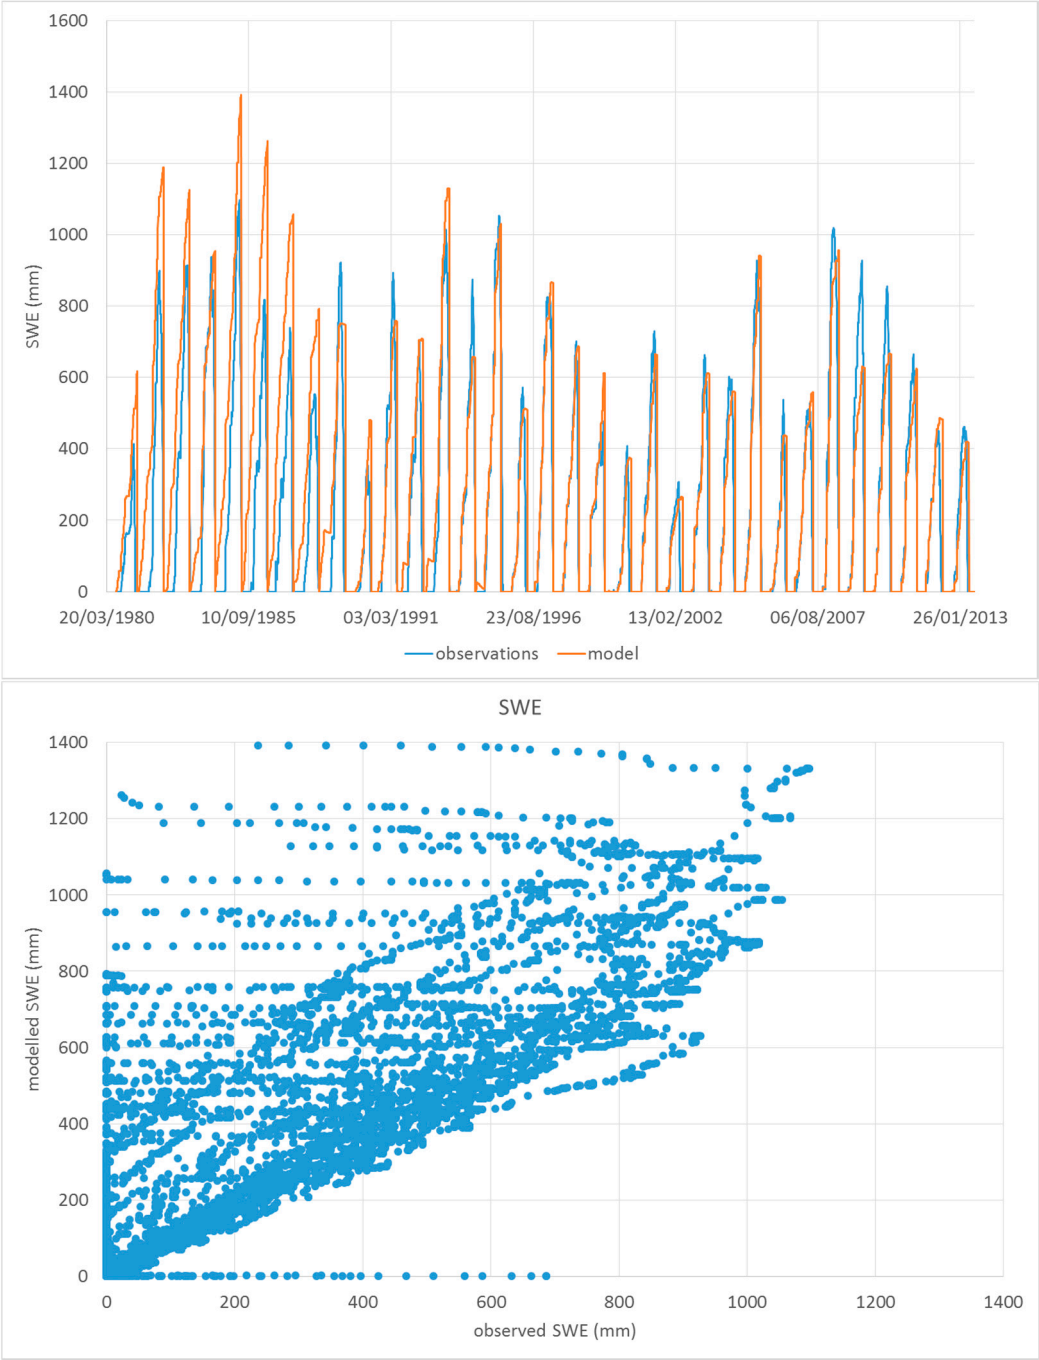

## Beartown

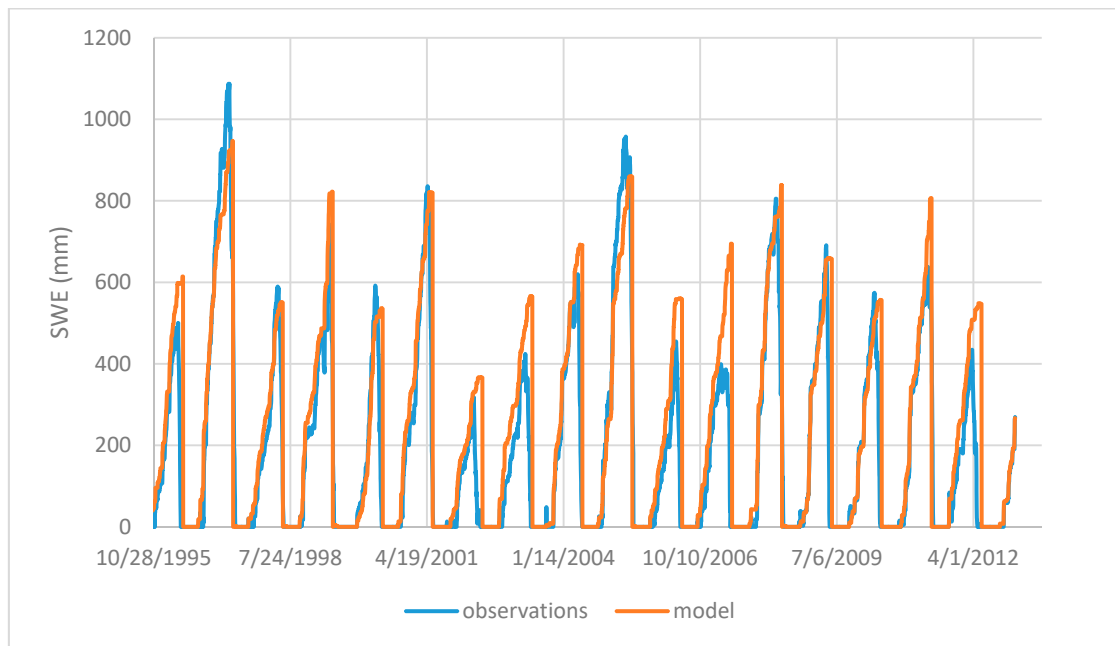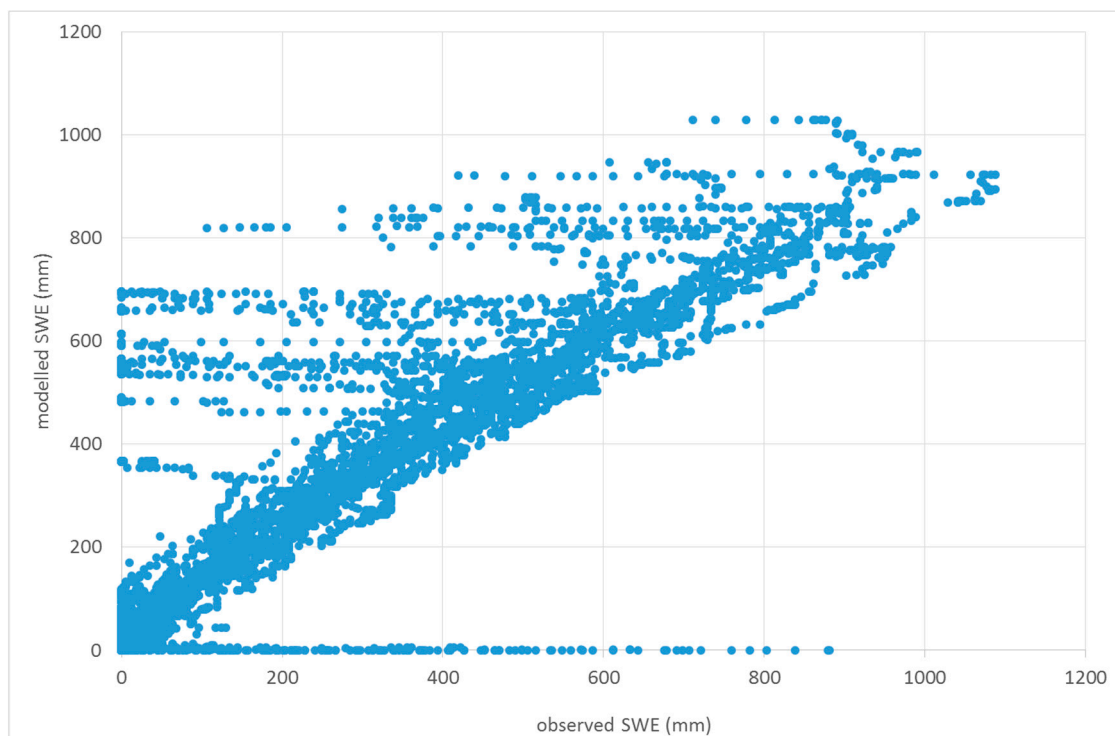

## Additional illustration material

Table S1. Corrections for the stations with snowmelt coefficients below 1 mm/°C day.  
P=cumulative precipitation during snow cover; T= cumulative temperature;  $\Delta Z$ = Indicative elevation difference from the nearest weather station.

| Code    | $\Delta Z(m)$ | $C_0$<br>with Elevation-Corrected<br>P and T<br>(mm/°C day) | R2 with<br>Elevation-<br>Corrected<br>P and T | $C_0$<br>after Adding<br>120 mm to P<br>(mm/°C day) | R2<br>after Adding<br>120 mm to P |
|---------|---------------|-------------------------------------------------------------|-----------------------------------------------|-----------------------------------------------------|-----------------------------------|
| X106Y29 | 700           | 1.69                                                        | 0.62                                          | 1.79                                                | 0.60                              |
| X124Y59 | 500           | 2.37                                                        | 0.5                                           | 2.50                                                | 0.50                              |
| X127Y14 | 500           | 2.8                                                         | 0.2                                           | 2.98                                                | 0.17                              |
| X35Y41  | 300           | 1.24                                                        | 0.84                                          | 1.31                                                | 0.28                              |
| X113Y18 | 700           | 3.48                                                        | 0.25                                          | 3.61                                                | 0.26                              |
| X75Y48  | 0             | 0.85                                                        | 0.37                                          | 0.85                                                | 0.37                              |



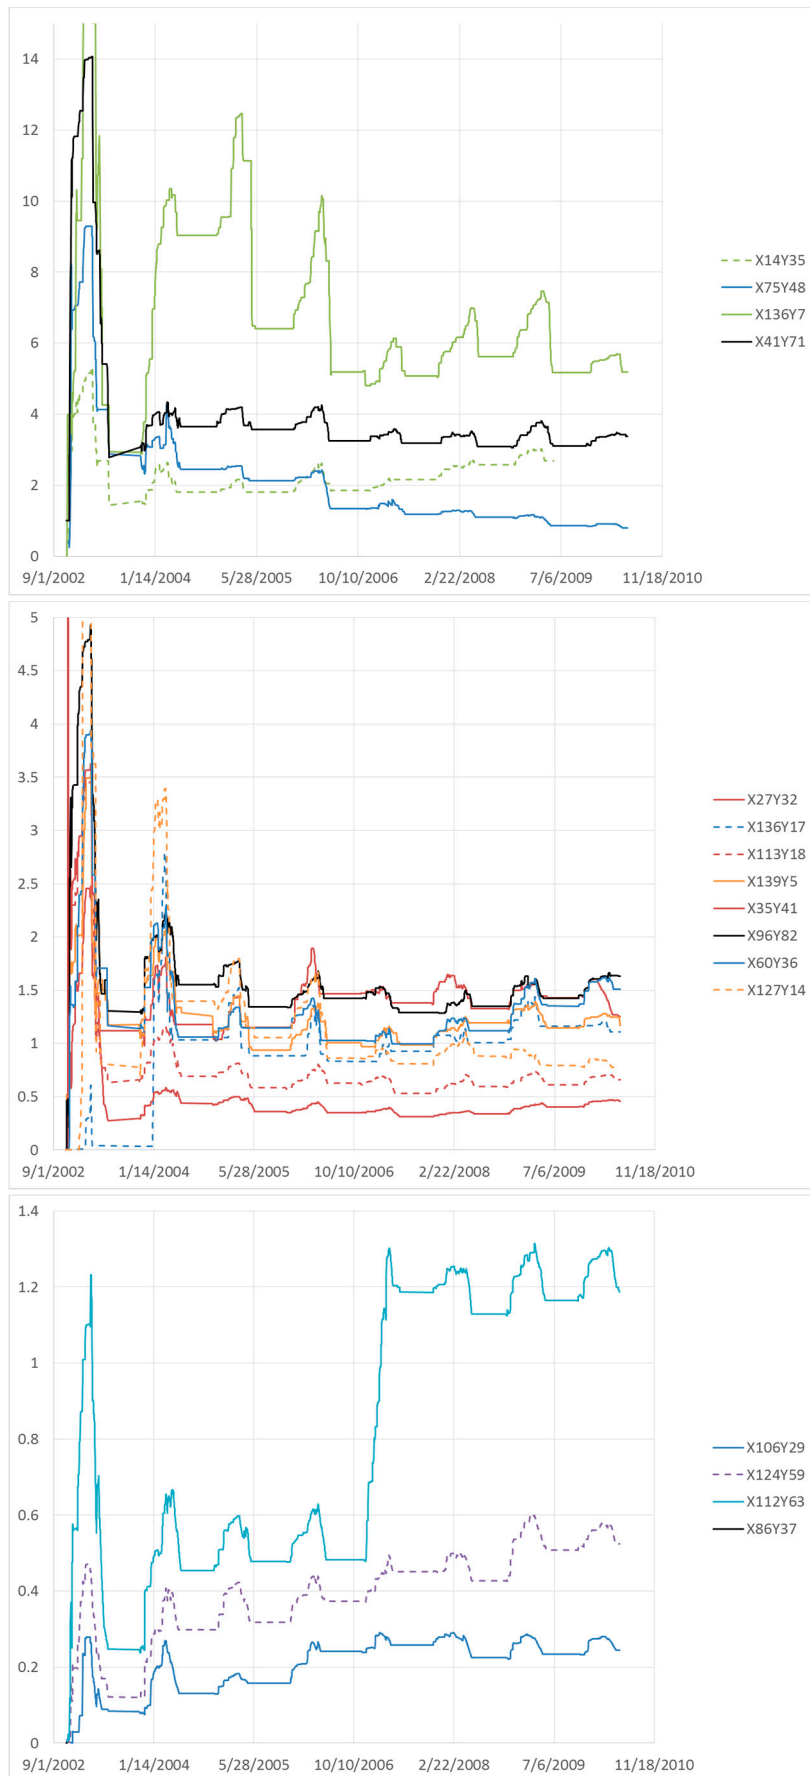

Figure S1. Estimated snowmelt coefficient as a function of the end date of the reference period for estimation.

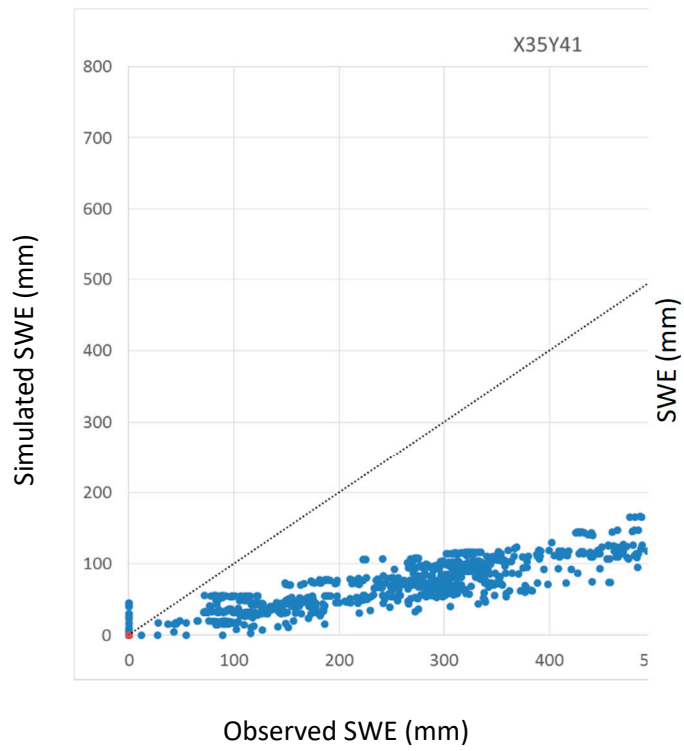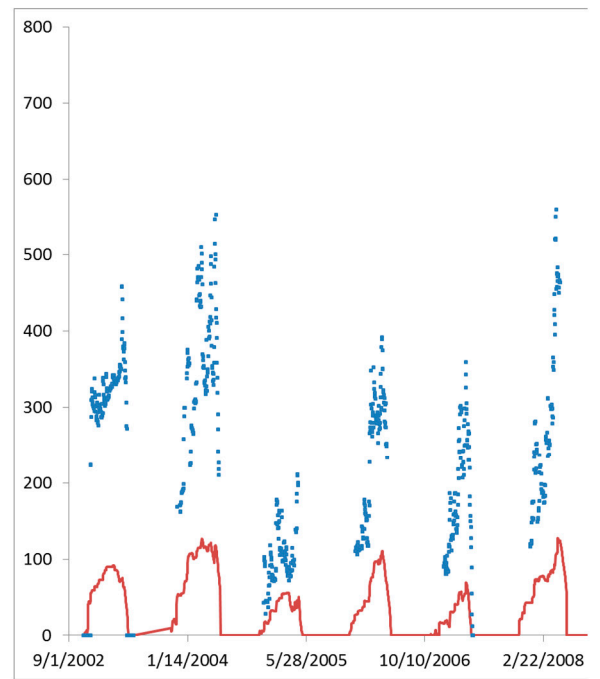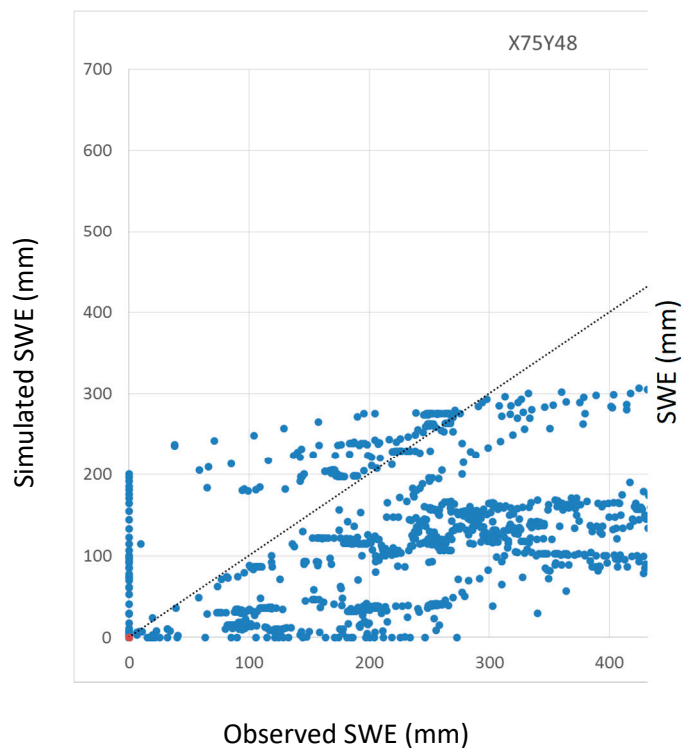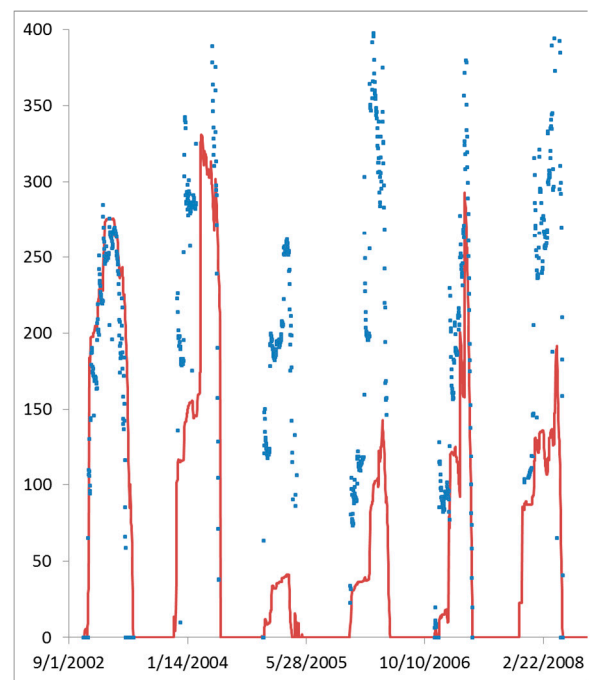

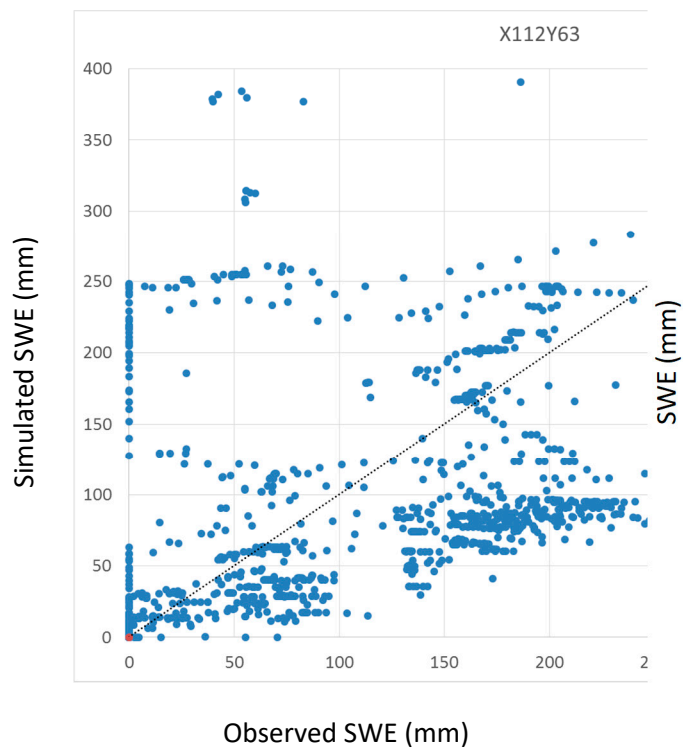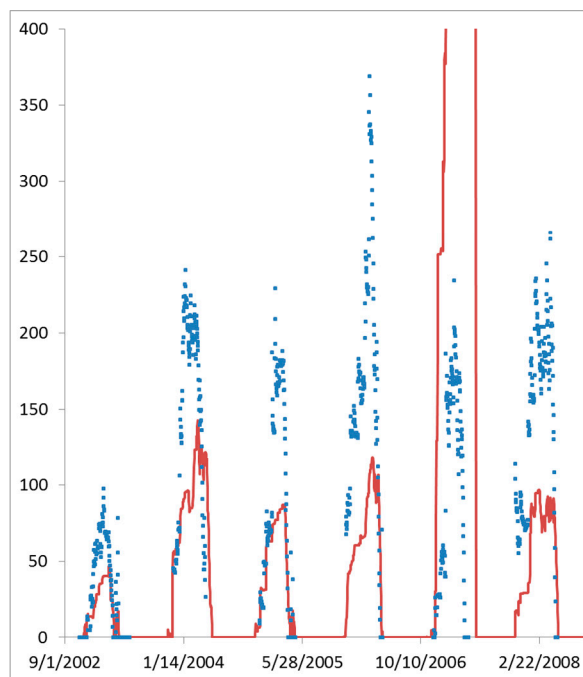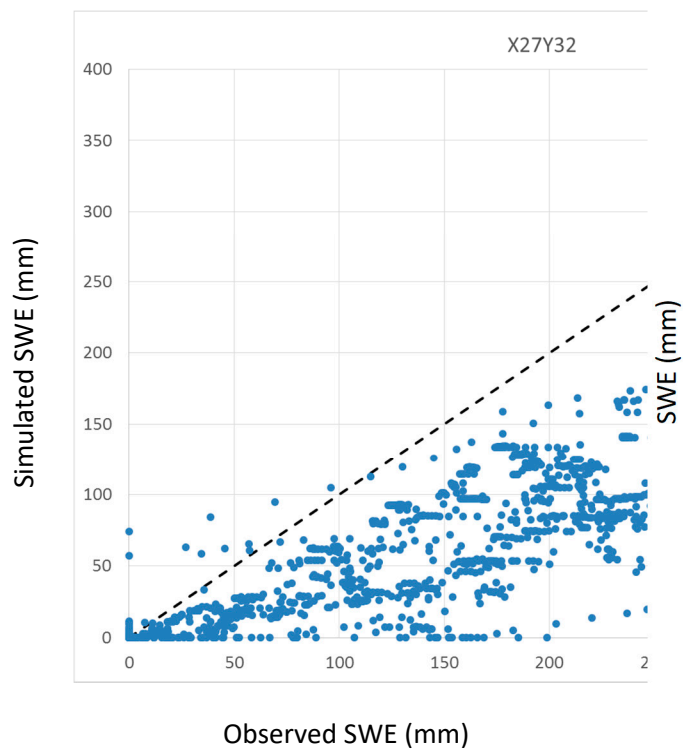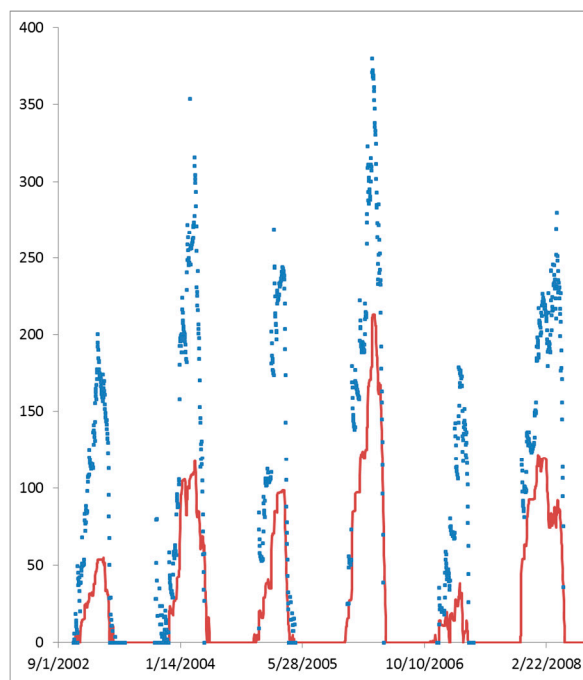

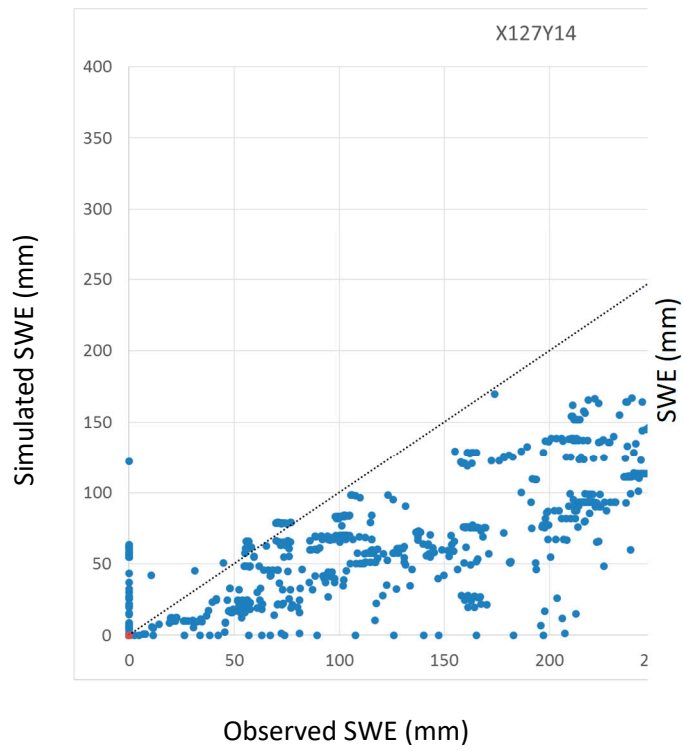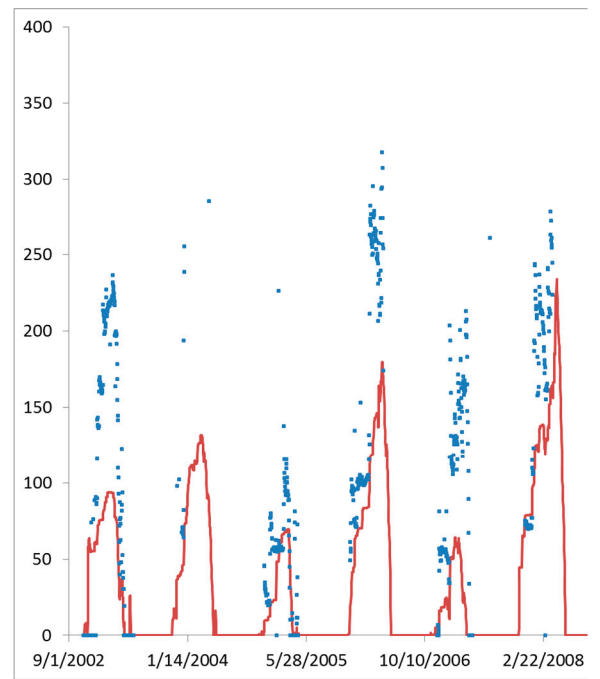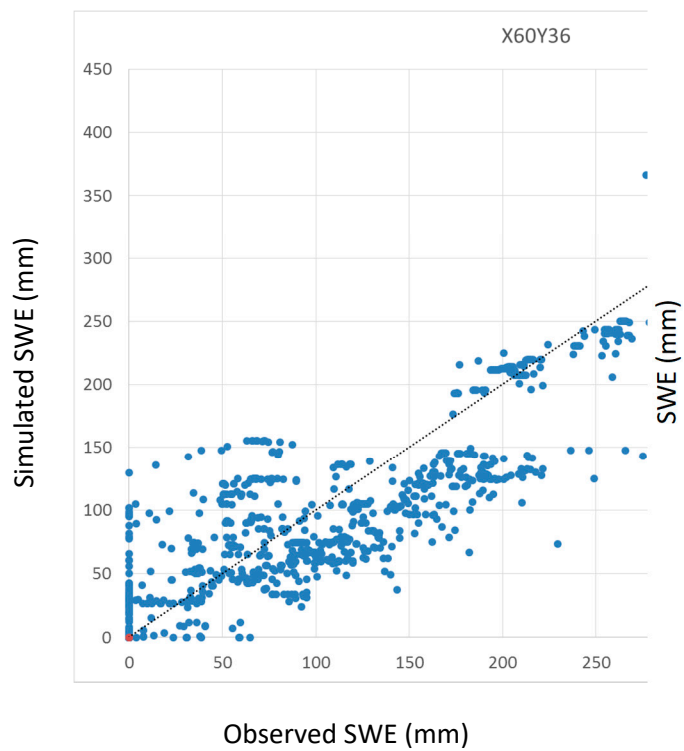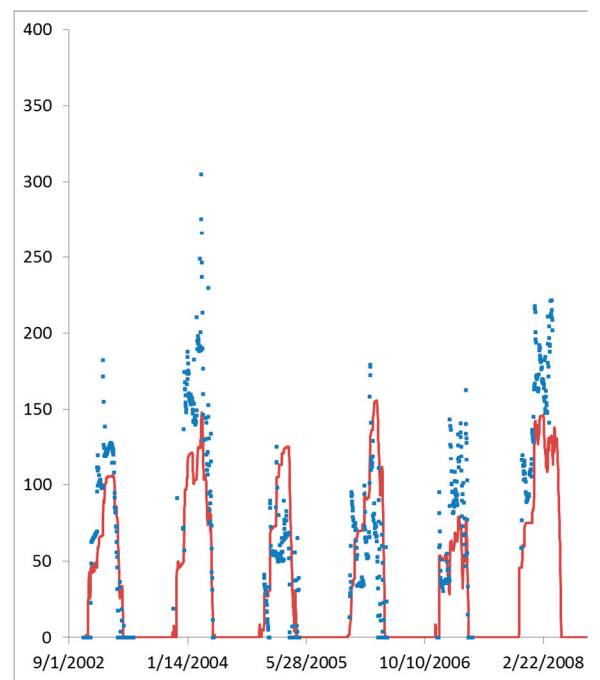

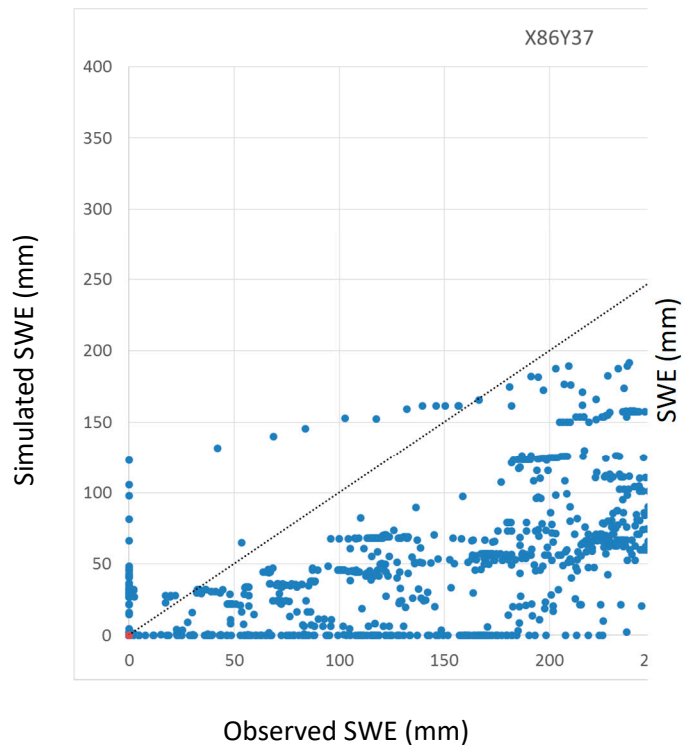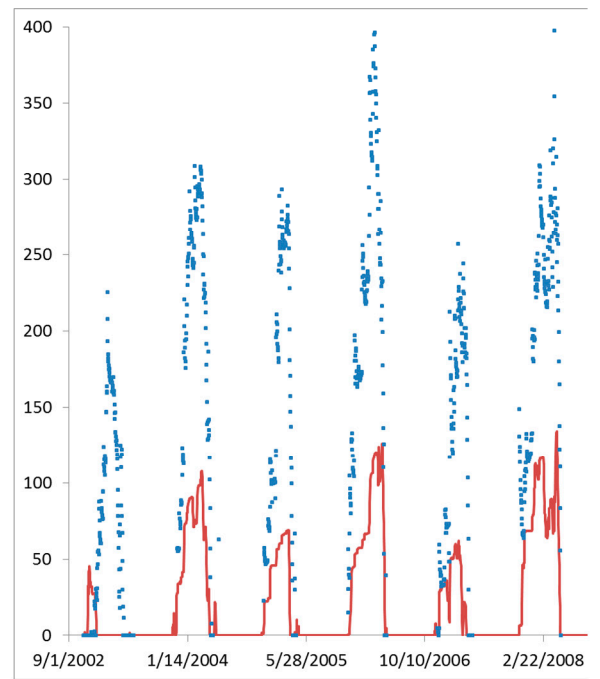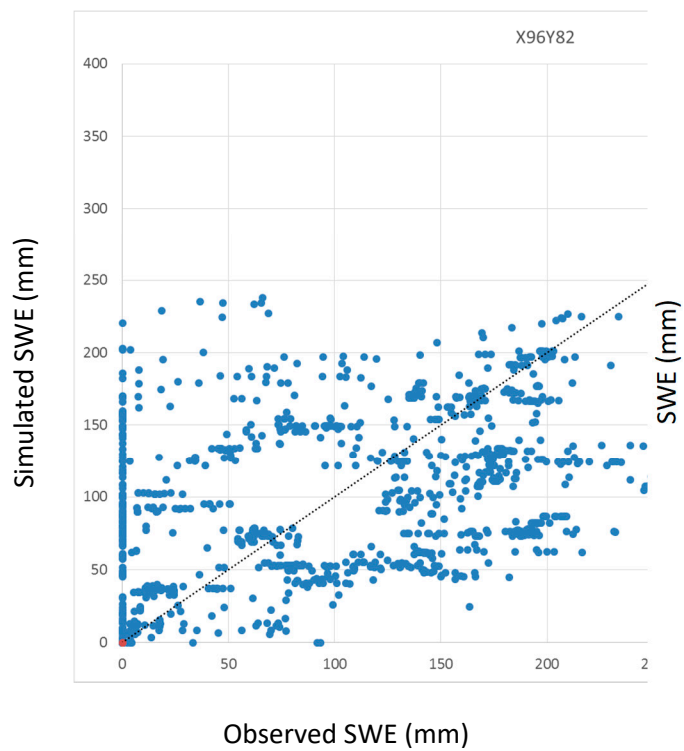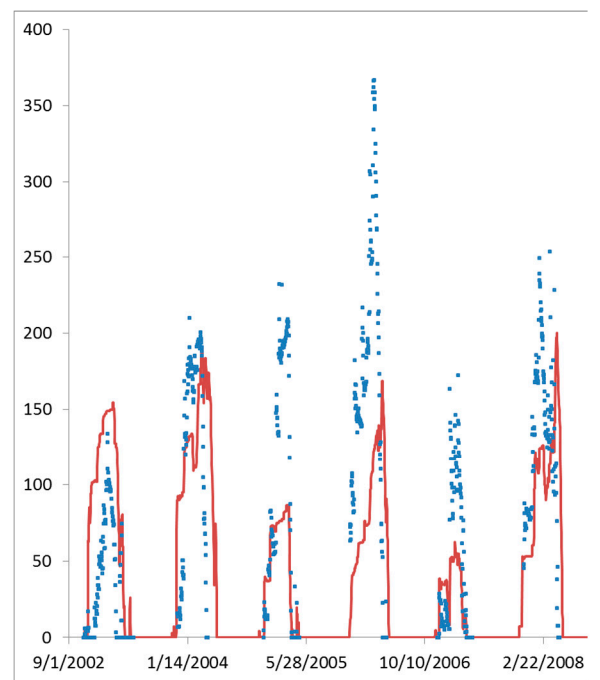

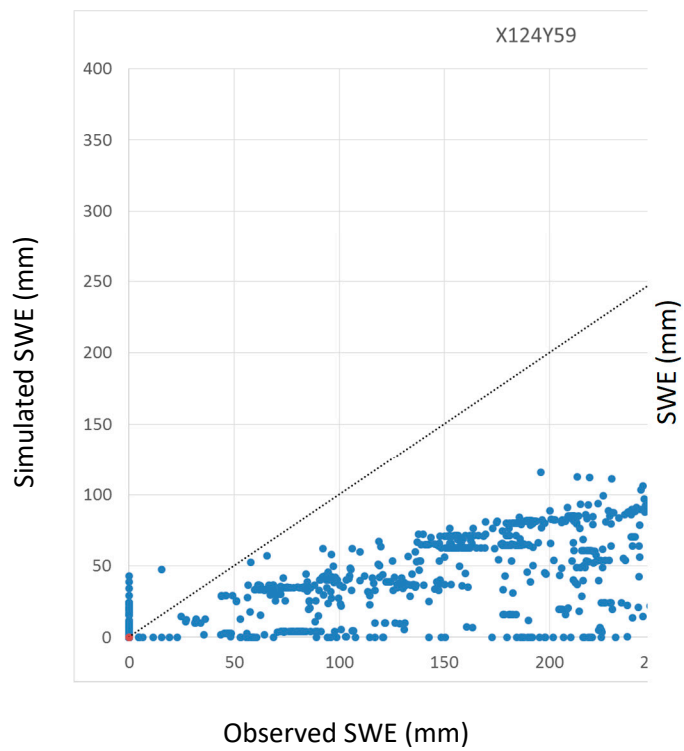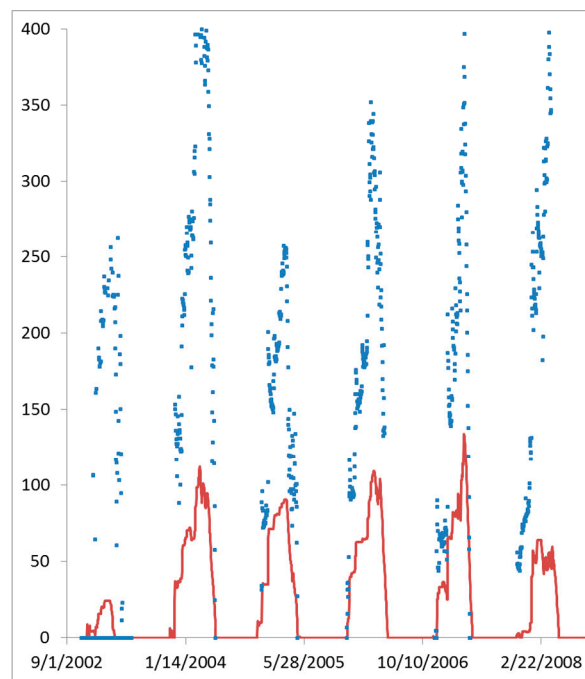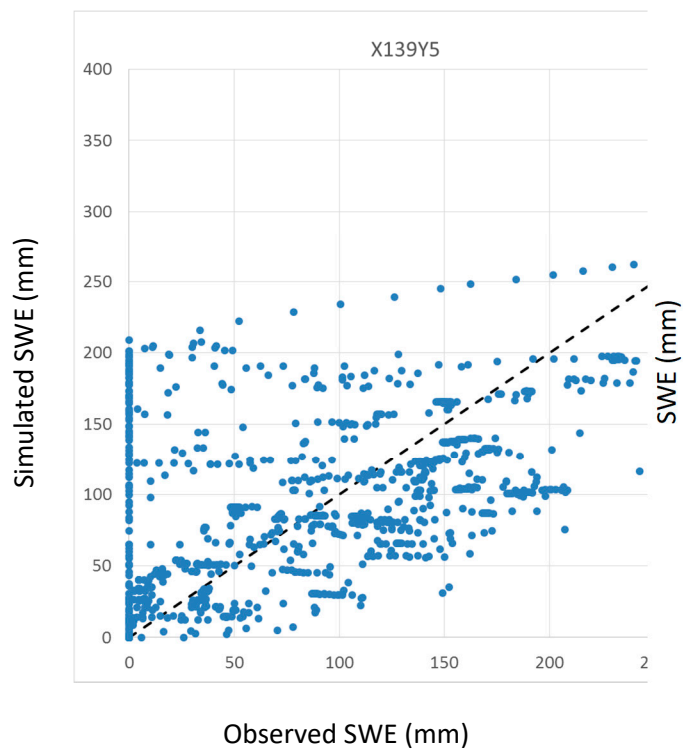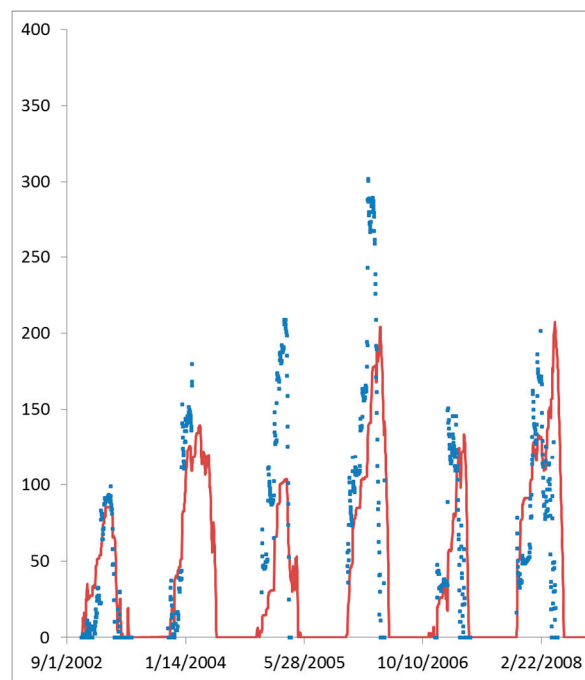

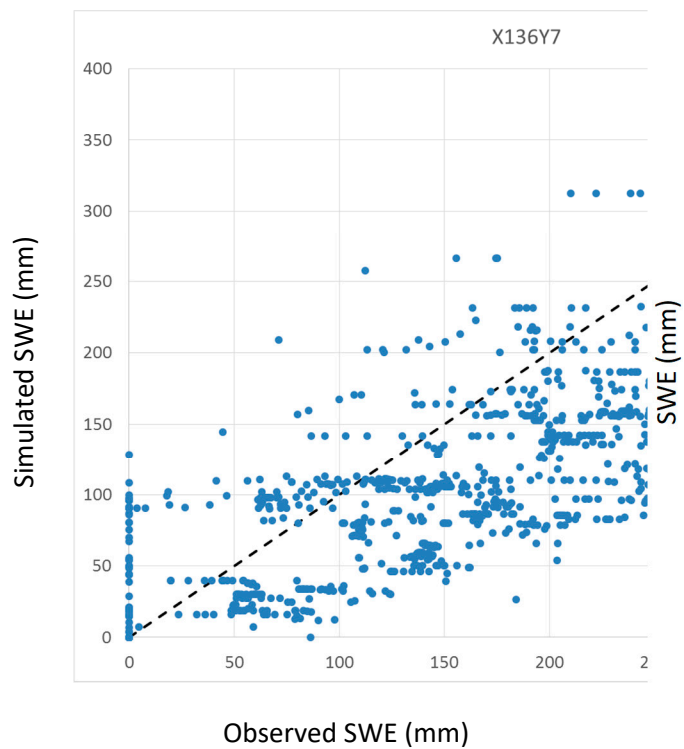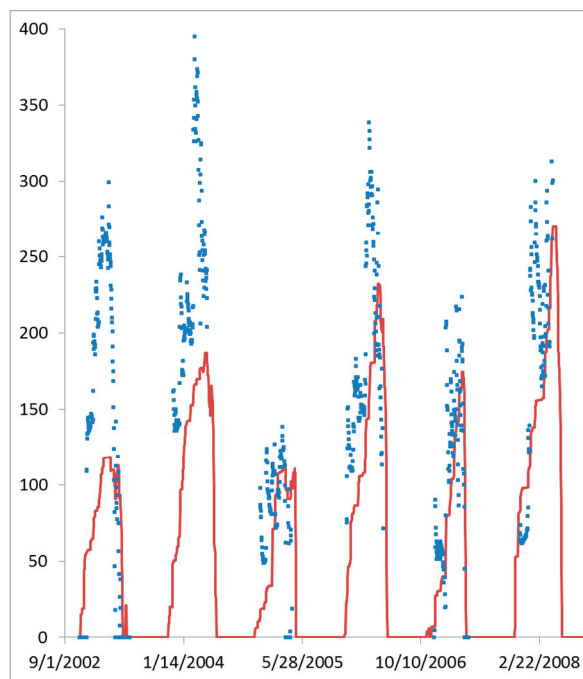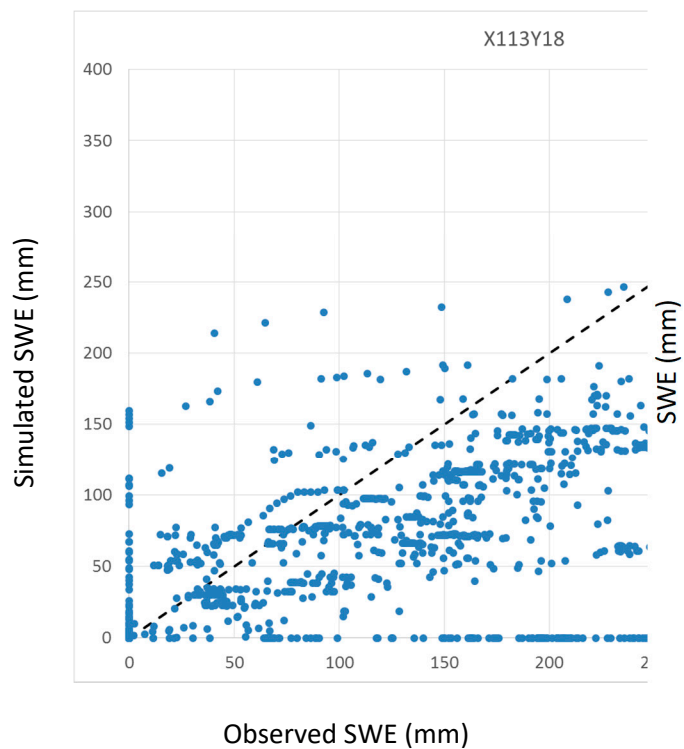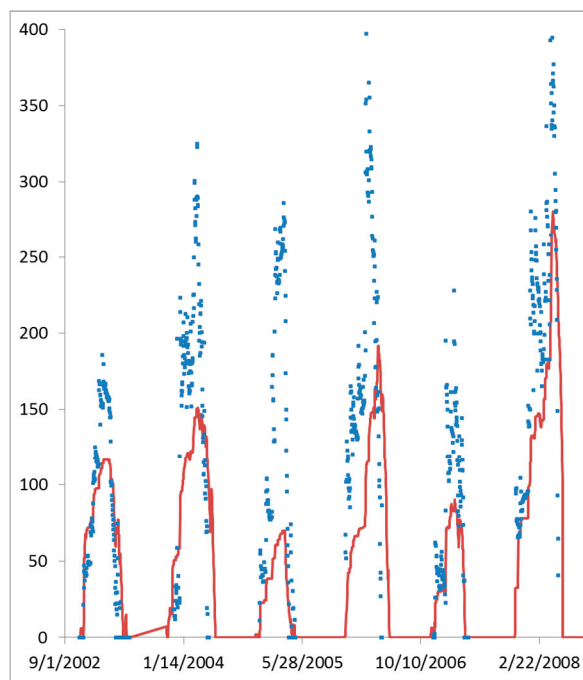



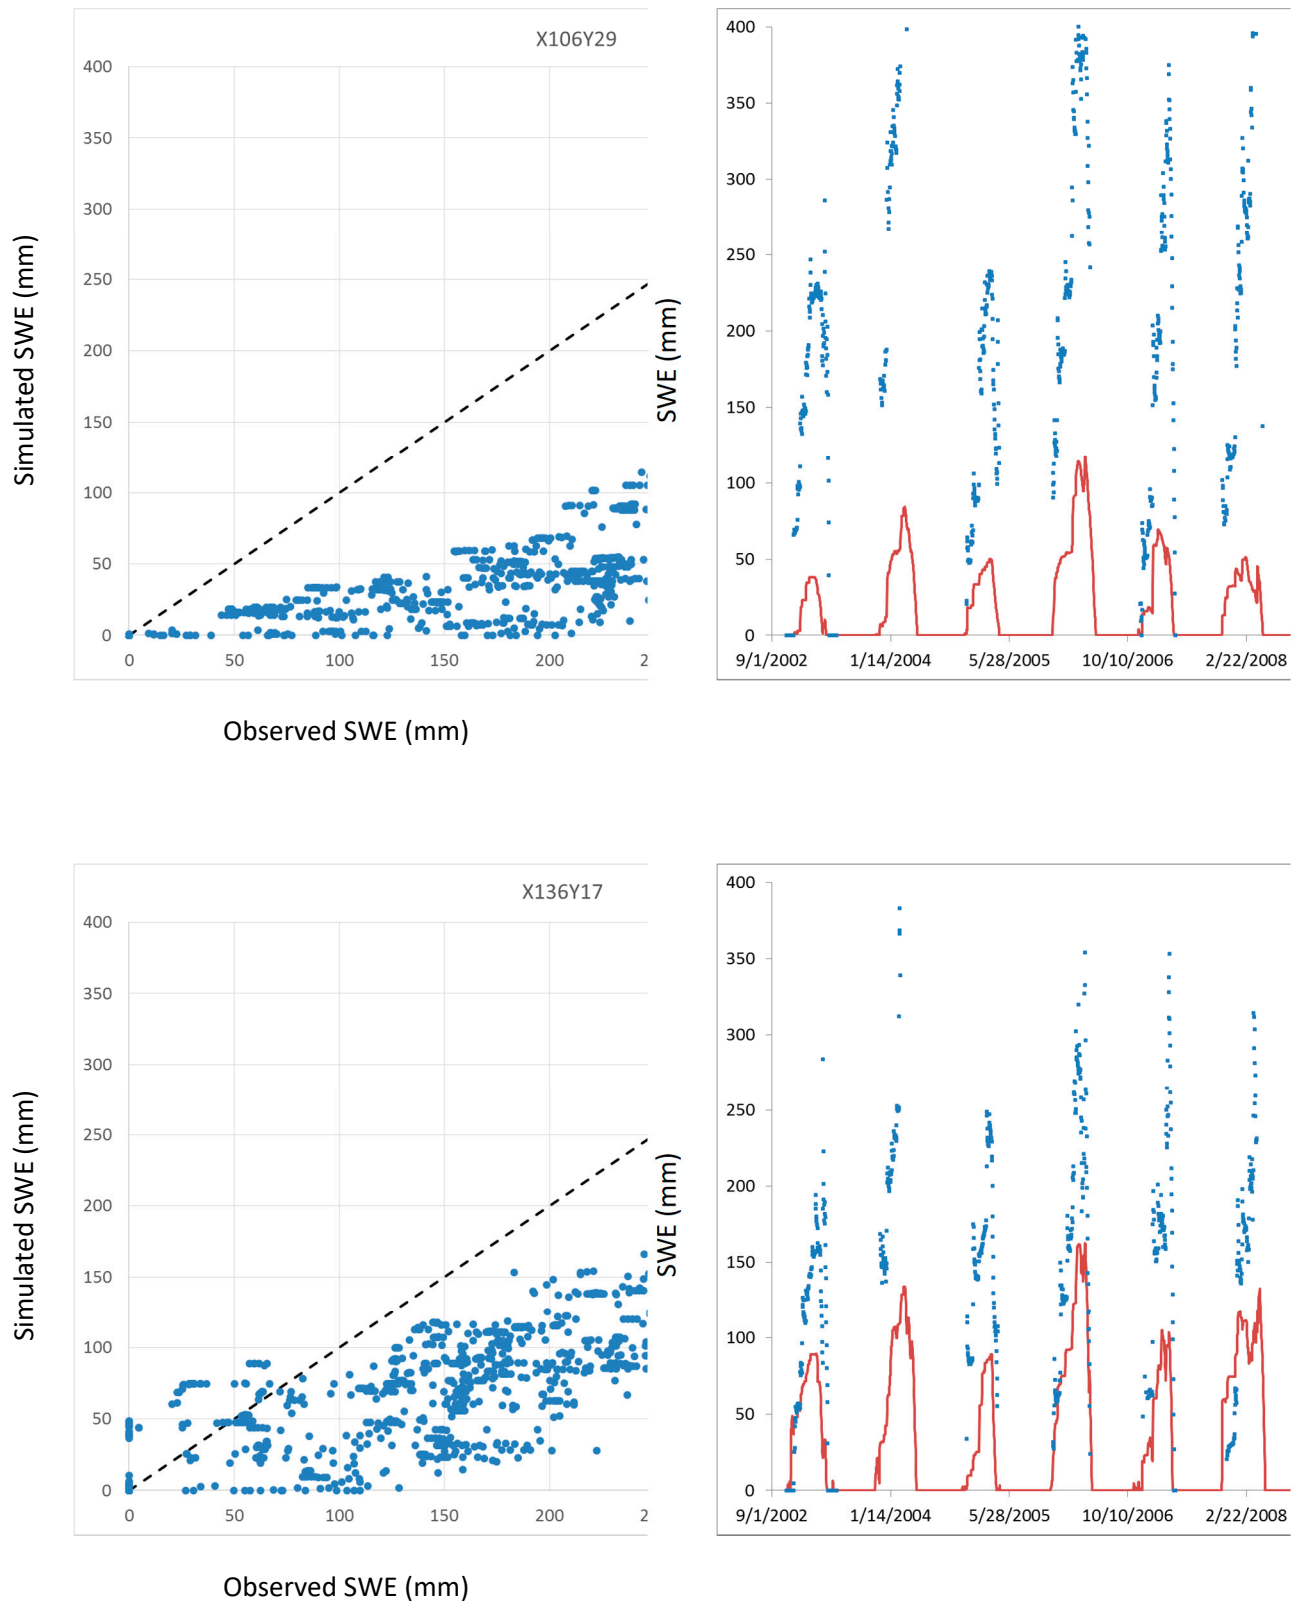

Figure S2. Scatter plots and time series of predicted and observed SWE at the measurement stations. For the identification of stations – see paper text.
